# Supplementary material for: Formation of Common Mycorrhizal Networks Significantly Affects Plant Biomass and Soil Properties of the Neighboring Plants under Various Nitrogen Levels
Source: PubMed Central journal article supplement (PMC7074789; doi:10.3390/microorganisms8020230), 2020-02-08
Supplement: microorganisms-08-00230-s001.pdf [file microorganisms-08-00230-s001.pdf]

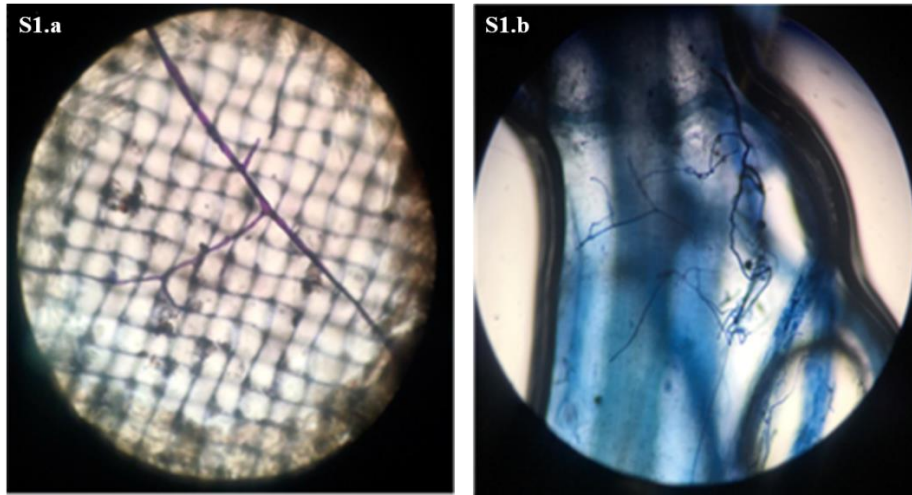

**Figure S1.** (a) AM fungal extraradical hyphae crossing through the mesh of the recipient compartment; (b) AM fungal colonization was observed in the recipient compartment at 200× magnification.

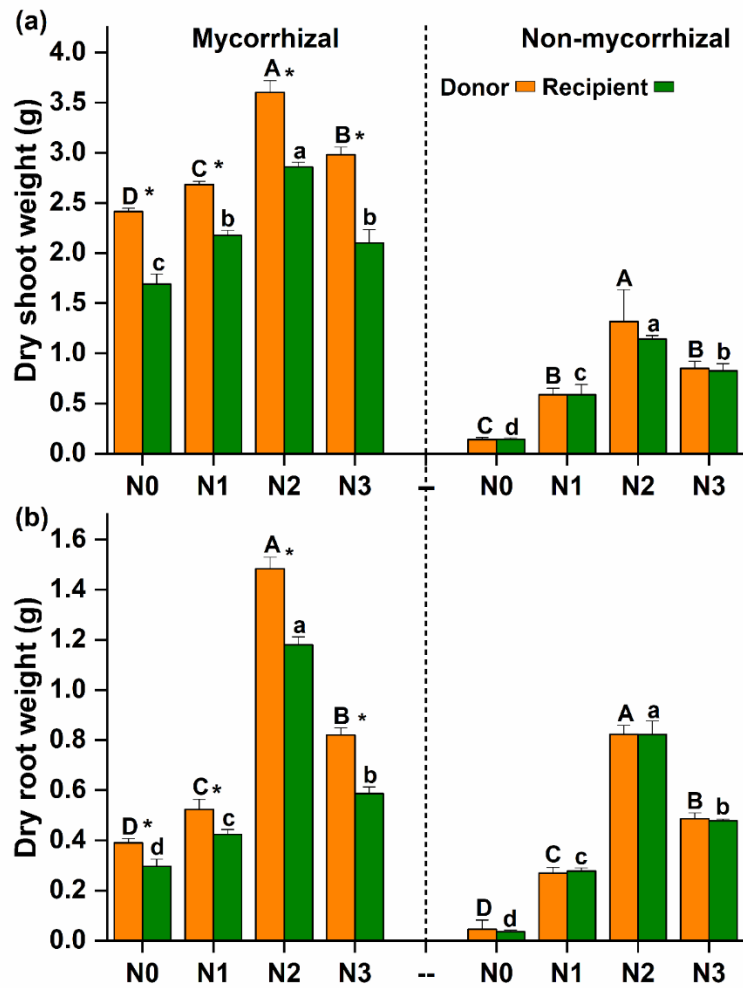

**Figure S2.** A gain in plant biomass of shoot and root of *C. squarrosa* seedlings. The inoculation with AM fungi increased shoot and root weight in mycorrhizal treatment as compared to non-mycorrhizal treatment; (a) dry shoot weight (DSW); (b) dry root weight (DRW); Alphabetic on the top of each bar is showing the  $LSD_{0.05}$  difference. Capital letters are showing the difference between donor, and small alphabets are showing difference among recipient plants at different treatments (N0, N1, N2, and N3). The symbol \* is showing the significant difference between donor and recipient plants at different N-treatment.

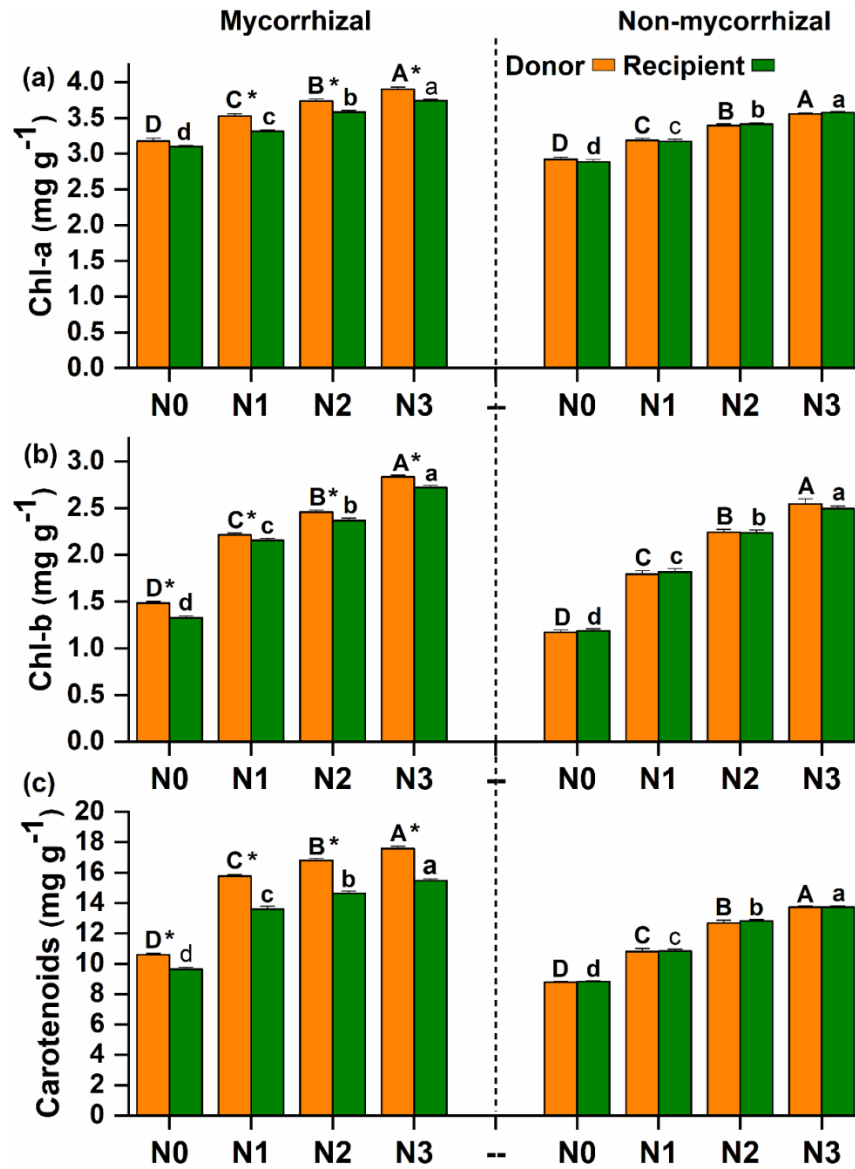

**Figure S3.** Chlorophyll content in *C. squarrosa* seedlings. The inoculation with AM fungi increased the chlorophyll content in mycorrhizal treatment as compared to non-mycorrhizal treatment; (a) Chl-a; (b) chl-b; (c) carotenoids. Alphabetic on the top of each bar is showing the LSD<sub>0.05</sub> difference. Capital letters are showing the difference between donor, and small alphabets are showing differences among recipient plants at different treatments (N0, N1, N2, and N3). The symbol \* is showing the significant difference between donor and recipient plants at different N-treatment.

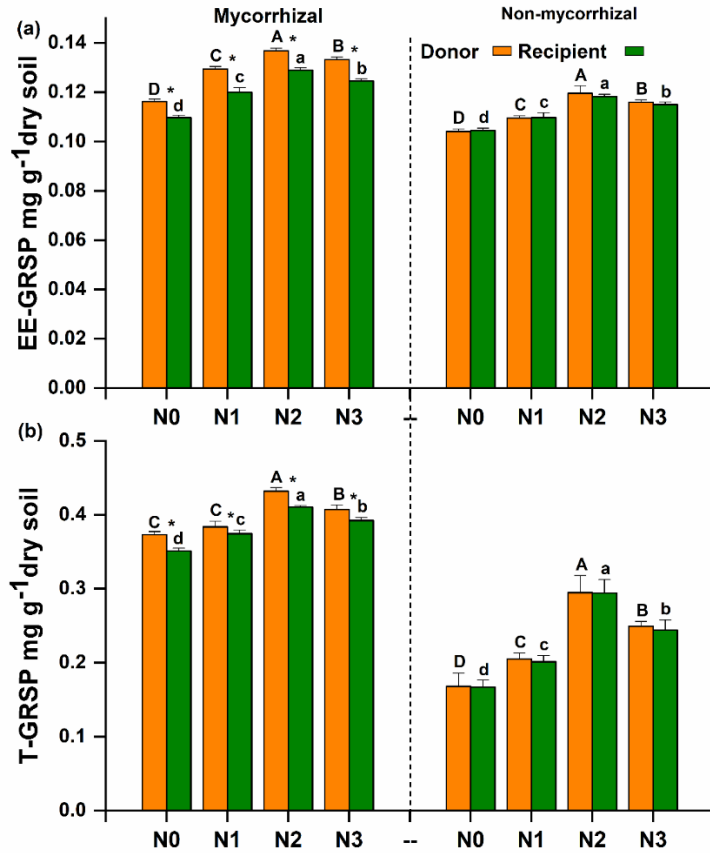

**Figure S4.** Soil concentration of glomalin-related soil proteins (GRSPs). Production of; (a) EE-GRSPs; (b) T-GRSPs in mycorrhizal and non-mycorrhizal treatments. Alphabetic on the top of each bar is showing the LSD<sub>0.05</sub> difference. Capital letters are showing the difference between donor, and small alphabets are showing difference among recipient plants at different treatments (N0, N1, N2, and N3). The symbol \* is showing the significant difference between donor and recipient plants at different N-treatment.

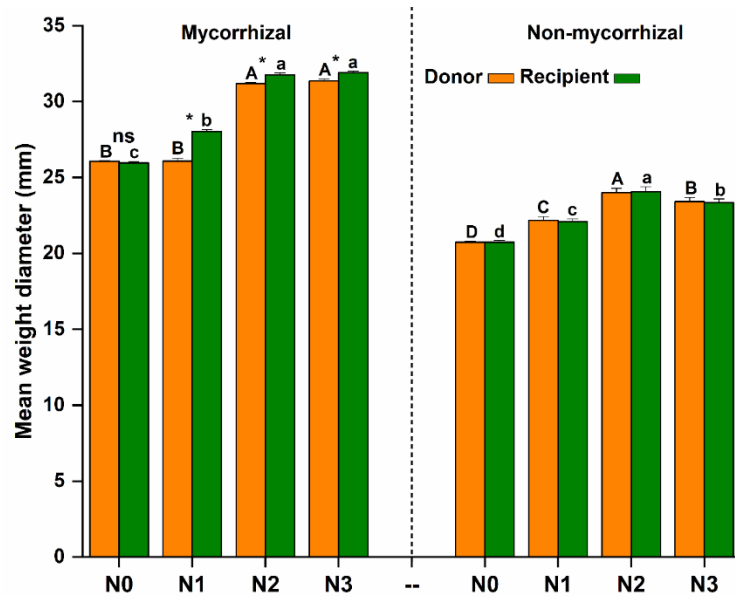

**Figure S5.** Mean weight diameter (MWD). Each value represents the mean  $\pm$  SD ( $n = 3$ ) of mycorrhizal treatment and non-mycorrhizal treatment. Different letters show the statistically significant differences between different nitrogen treatments. Alphabetic on the top of each bar is showing the  $LSD_{0.05}$  difference. Capital letters indicate the difference between donor, and small letters are showing difference among recipient plants at different nitrogen treatments. The symbol \* shows the significant difference between donor and recipient plants for MWD at each nitrogen treatment.

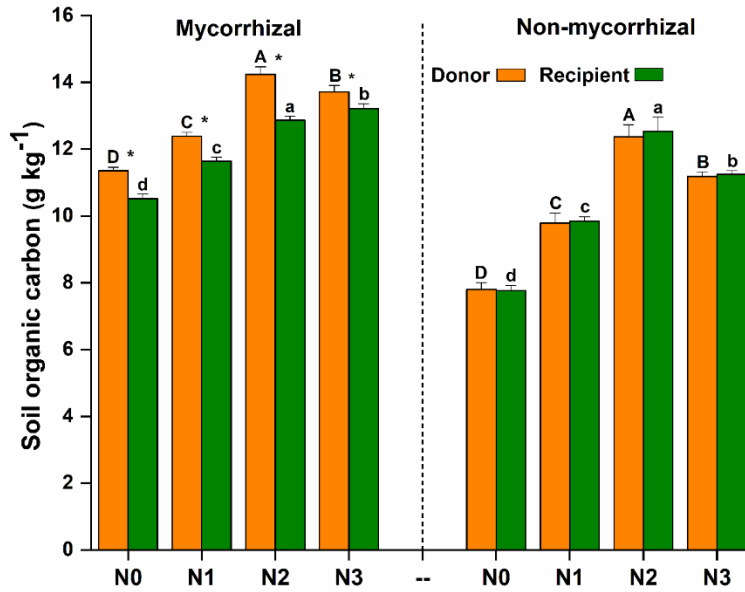

**Figure S6.** Increase in soil organic carbon (SOC). Each value represents the mean  $\pm$  SD ( $n = 3$ ). Different letters show the statistically significant differences between different nitrogen treatments. Alphabetic on the top of each bar is showing the  $LSD_{0.05}$  difference. Capital letters indicate the difference between donor, and small alphabets are showing differences among recipient plants at different nitrogen treatment. The symbol \* is showing the significant difference between donor and recipient plants at different N-treatment.

**Table S1.** Water-stable aggregates distribution in mycorrhizal and non-mycorrhizal treatment at different levels of nitrogen.

| Treatments             |                    | N0            |               | N1            |               | N2            |               | N3            |  |
|------------------------|--------------------|---------------|---------------|---------------|---------------|---------------|---------------|---------------|--|
| Size                   | Donor              | Recipient     | Donor         | Recipient     | Donor         | Recipient     | Donor         | Recipient     |  |
|                        | <b>Mycorrhizal</b> |               |               |               |               |               |               |               |  |
| 2-1mm                  | 1.020±0.092C       | 1.020±0.060d  | 0.847±0.103D  | 2.153±0.091c  | 3.887±0.050B  | 2.300±0.080b  | 4.453±0.090A  | 4.286±0.061a  |  |
| 1-0.5mm                | 4.986±.110C        | 4.513±0.061c  | 4.513±0.050D  | 5.240±0.080b  | 6.493±0.071A  | 6.446±0.061a  | 5.300±0.072B  | 5.300±0.060b  |  |
| 0.5-0.25mm             | 36.193±.130C       | 36.940±0.092d | 38.400±0.600A | 37.180±0.060c | 37.133±0.416B | 48.267±0.090a | 37.68±0.111B  | 40.780±0.092b |  |
| <0.25mm                | 57.067±0.131A      | 57.533±0.031a | 56.933±0.558B | 55.067±0.128b | 52.467±0.344C | 43.740±0.163d | 52.80±0.186C  | 52.133±0.14c  |  |
| <b>Non-mycorrhizal</b> |                    |               |               |               |               |               |               |               |  |
| 2-1mm                  | 0.080±0.020D       | 0.080±0.040c  | 0.180±0.020C  | 0.140±0.020c  | 0.267±0.031B  | 0.260±0.040b  | 0.470±0.056A  | 0.480±0.040a  |  |
| 1-0.5mm                | 3.260±0.100D       | 3.250±0.100d  | 3.573±0.081C  | 3.550±0.121c  | 4.347±0.081A  | 4.380±0.080a  | 3.853±0.090B  | 3.820±0.060b  |  |
| 0.5-0.25mm             | 24.367±0.070D      | 24.367±0.101d | 28.787±0.729C | 28.693±0.699c | 33.673±0.921A | 33.833±1.213a | 31.400±0.596B | 31.173±0.718b |  |
| <0.25mm                | 72.293±0.162A      | 72.353±0.170a | 67.640±0.817B | 62.620±0.676b | 61.713±0.998D | 61.527±1.229d | 64.287±0.726C | 64.527±0.778c |  |

Data (means ± SD, *n* = 3). Different letters (capital letters for donor and small letters for recipient) indicates the significant differences (*p* < 0.05) between different nitrogen treatments.
